# Supplementary material
Source: HighWire-hosted journal article supplement (https://erj.ersjournals.com/content/suppl/2013/06/03/09031936.00118912)
Supplement: ERJ-01148-2012_Disclosures.pdf [file ERJ-01148-2012_Disclosures.pdf]

**J.W.C. Alffenaar** has received an educational grant from Pfizer, MSD and Schering-Plough for organising symposia on antifungal treatment. He has also received research funding from Pfizer, MSD and Astellas.
